# Supplementary material
Source: MDPI journal article supplement (https://www.mdpi.com/2071-1050/12/24/10278)
Supplement: s1 [file s1]

## Sheet: Article_Info
Paper Title:	Improved serviceability and environmental performance of one-way slabs through the use of layered natural and recycled aggregate concrete
Journal:	Sustainability
Authors:	Nikola Tošić1
	Snežana Marinković2
	Yahya Kurama3
Affiliations:	1 Civil and Environmental Engineering Department, Universitat Politècnica de Catalunya, Jordi Girona 1–3, 08034 Barcelona, Spain
	2 University of Belgrade, Faculty of Civil Engineering, Bulevar kralja Aleksandra 73, 11000 Belgrade, Serbia
	3 Department of Civil and Environmental Engineering and Earth Sciences, University of Notre Dame, Notre Dame, IN 46556, USA
E-mail:	nikola.tosic@upc.edu

## Sheet: Simply_supported_slabs
192
		Parameters
		1	2	3	4	5	6	7	8			9	10	11	12	13	14		15		16		17		18	19
		Top half (RCA%)	Bottom half (RCA%)	Top layer/h	qqp/qEd	fck (MPa)	RH (%)	h (mm)	L/d			b (mm)	d (mm)	gsw (N/mm')	Δg (N/mm')	q (N/mm')	ψ2		As (mm2)		fcm (MPa)		L (mm)		t (days)	alim (mm)
1		0	0	1	0.52	30	80	200	20			1000	170	5	3	3	0		306		38		3400		9125	13.6
2		0	0	1	0.52	30	80	200	22			1000	170	5	3	3	0		373		38		3740		9125	14.96
3		0	0	1	0.52	30	80	200	24			1000	170	5	3	3	0		448		38		4080		9125	16.32
4		0	0	1	0.52	30	80	200	26			1000	170	5	3	3	0		528		38		4420		9125	17.68
5		0	0	1	0.52	30	80	200	28			1000	170	5	3	3	0		616		38		4760		9125	19.04
6		0	0	1	0.52	30	80	200	30			1000	170	5	3	3	0		714		38		5100		9125	20.4
7		50	50	1	0.52	30	80	200	20			1000	170	5	3	3	0		306		38		3400		9125	13.6
8		50	50	1	0.52	30	80	200	22			1000	170	5	3	3	0		373		38		3740		9125	14.96
9		50	50	1	0.52	30	80	200	24			1000	170	5	3	3	0		448		38		4080		9125	16.32
10		50	50	1	0.52	30	80	200	26			1000	170	5	3	3	0		528		38		4420		9125	17.68
11		50	50	1	0.52	30	80	200	28			1000	170	5	3	3	0		616		38		4760		9125	19.04
12		50	50	1	0.52	30	80	200	30			1000	170	5	3	3	0		714		38		5100		9125	20.4
13		100	100	1	0.52	30	80	200	20			1000	170	5	3	3	0		306		38		3400		9125	13.6
14		100	100	1	0.52	30	80	200	22			1000	170	5	3	3	0		373		38		3740		9125	14.96
15		100	100	1	0.52	30	80	200	24			1000	170	5	3	3	0		448		38		4080		9125	16.32
16		100	100	1	0.52	30	80	200	26			1000	170	5	3	3	0		528		38		4420		9125	17.68
17		100	100	1	0.52	30	80	200	28			1000	170	5	3	3	0		616		38		4760		9125	19.04
18		100	100	1	0.52	30	80	200	30			1000	170	5	3	3	0		714		38		5100		9125	20.4
19		0	100	0.5	0.52	30	80	200	20			1000	170	5	3	3	0		306		38		3400		9125	13.6
20		0	100	0.5	0.52	30	80	200	22			1000	170	5	3	3	0		373		38		3740		9125	14.96
21		0	100	0.5	0.52	30	80	200	24			1000	170	5	3	3	0		448		38		4080		9125	16.32
22		0	100	0.5	0.52	30	80	200	26			1000	170	5	3	3	0		528		38		4420		9125	17.68
23		0	100	0.5	0.52	30	80	200	28			1000	170	5	3	3	0		616		38		4760		9125	19.04
24		0	100	0.5	0.52	30	80	200	30			1000	170	5	3	3	0		714		38		5100		9125	20.4
25		0	0	1	0.64	30	80	200	20			1000	170	5	3	3	0.6		306		38		3400		9125	13.6
26		0	0	1	0.64	30	80	200	22			1000	170	5	3	3	0.6		373		38		3740		9125	14.96
27		0	0	1	0.64	30	80	200	24			1000	170	5	3	3	0.6		448		38		4080		9125	16.32
28		0	0	1	0.64	30	80	200	26			1000	170	5	3	3	0.6		528		38		4420		9125	17.68
29		0	0	1	0.64	30	80	200	28			1000	170	5	3	3	0.6		616		38		4760		9125	19.04
30		0	0	1	0.64	30	80	200	30			1000	170	5	3	3	0.6		714		38		5100		9125	20.4
31		50	50	1	0.64	30	80	200	20			1000	170	5	3	3	0.6		306		38		3400		9125	13.6
32		50	50	1	0.64	30	80	200	22			1000	170	5	3	3	0.6		373		38		3740		9125	14.96
33		50	50	1	0.64	30	80	200	24			1000	170	5	3	3	0.6		448		38		4080		9125	16.32
34		50	50	1	0.64	30	80	200	26			1000	170	5	3	3	0.6		528		38		4420		9125	17.68
35		50	50	1	0.64	30	80	200	28			1000	170	5	3	3	0.6		616		38		4760		9125	19.04
36		50	50	1	0.64	30	80	200	30			1000	170	5	3	3	0.6		714		38		5100		9125	20.4
37		100	100	1	0.64	30	80	200	20			1000	170	5	3	3	0.6		306		38		3400		9125	13.6
38		100	100	1	0.64	30	80	200	22			1000	170	5	3	3	0.6		373		38		3740		9125	14.96
39		100	100	1	0.64	30	80	200	24			1000	170	5	3	3	0.6		448		38		4080		9125	16.32
40		100	100	1	0.64	30	80	200	26			1000	170	5	3	3	0.6		528		38		4420		9125	17.68
41		100	100	1	0.64	30	80	200	28			1000	170	5	3	3	0.6		616		38		4760		9125	19.04
42		100	100	1	0.64	30	80	200	30			1000	170	5	3	3	0.6		714		38		5100		9125	20.4
43		0	100	0.5	0.64	30	80	200	20			1000	170	5	3	3	0.6		306		38		3400		9125	13.6
44		0	100	0.5	0.64	30	80	200	22			1000	170	5	3	3	0.6		373		38		3740		9125	14.96
45		0	100	0.5	0.64	30	80	200	24			1000	170	5	3	3	0.6		448		38		4080		9125	16.32
46		0	100	0.5	0.64	30	80	200	26			1000	170	5	3	3	0.6		528		38		4420		9125	17.68
47		0	100	0.5	0.64	30	80	200	28			1000	170	5	3	3	0.6		616		38		4760		9125	19.04
48		0	100	0.5	0.64	30	80	200	30			1000	170	5	3	3	0.6		714		38		5100		9125	20.4
49		0	0	1	0.52	30	50	200	20			1000	170	5	3	3	0		306		38		3400		9125	13.6
50		0	0	1	0.52	30	50	200	22			1000	170	5	3	3	0		373		38		3740		9125	14.96
51		0	0	1	0.52	30	50	200	24			1000	170	5	3	3	0		448		38		4080		9125	16.32
52		0	0	1	0.52	30	50	200	26			1000	170	5	3	3	0		528		38		4420		9125	17.68
53		0	0	1	0.52	30	50	200	28			1000	170	5	3	3	0		616		38		4760		9125	19.04
54		0	0	1	0.52	30	50	200	30			1000	170	5	3	3	0		714		38		5100		9125	20.4
55		50	50	1	0.52	30	50	200	20			1000	170	5	3	3	0		306		38		3400		9125	13.6
56		50	50	1	0.52	30	50	200	22			1000	170	5	3	3	0		373		38		3740		9125	14.96
57		50	50	1	0.52	30	50	200	24			1000	170	5	3	3	0		448		38		4080		9125	16.32
58		50	50	1	0.52	30	50	200	26			1000	170	5	3	3	0		528		38		4420		9125	17.68
59		50	50	1	0.52	30	50	200	28			1000	170	5	3	3	0		616		38		4760		9125	19.04
60		50	50	1	0.52	30	50	200	30			1000	170	5	3	3	0		714		38		5100		9125	20.4
61		100	100	1	0.52	30	50	200	20			1000	170	5	3	3	0		306		38		3400		9125	13.6
62		100	100	1	0.52	30	50	200	22			1000	170	5	3	3	0		373		38		3740		9125	14.96
63		100	100	1	0.52	30	50	200	24			1000	170	5	3	3	0		448		38		4080		9125	16.32
64		100	100	1	0.52	30	50	200	26			1000	170	5	3	3	0		528		38		4420		9125	17.68
65		100	100	1	0.52	30	50	200	28			1000	170	5	3	3	0		616		38		4760		9125	19.04
66		100	100	1	0.52	30	50	200	30			1000	170	5	3	3	0		714		38		5100		9125	20.4
67		0	100	0.5	0.52	30	50	200	20			1000	170	5	3	3	0		306		38		3400		9125	13.6
68		0	100	0.5	0.52	30	50	200	22			1000	170	5	3	3	0		373		38		3740		9125	14.96
69		0	100	0.5	0.52	30	50	200	24			1000	170	5	3	3	0		448		38		4080		9125	16.32
70		0	100	0.5	0.52	30	50	200	26			1000	170	5	3	3	0		528		38		4420		9125	17.68
71		0	100	0.5	0.52	30	50	200	28			1000	170	5	3	3	0		616		38		4760		9125	19.04
72		0	100	0.5	0.52	30	50	200	30			1000	170	5	3	3	0		714		38		5100		9125	20.4
73		0	0	1	0.64	30	50	200	20			1000	170	5	3	3	0.6		306		38		3400		9125	13.6
74		0	0	1	0.64	30	50	200	22			1000	170	5	3	3	0.6		373		38		3740		9125	14.96
75		0	0	1	0.64	30	50	200	24			1000	170	5	3	3	0.6		448		38		4080		9125	16.32
76		0	0	1	0.64	30	50	200	26			1000	170	5	3	3	0.6		528		38		4420		9125	17.68
77		0	0	1	0.64	30	50	200	28			1000	170	5	3	3	0.6		616		38		4760		9125	19.04
78		0	0	1	0.64	30	50	200	30			1000	170	5	3	3	0.6		714		38		5100		9125	20.4
79		50	50	1	0.64	30	50	200	20			1000	170	5	3	3	0.6		306		38		3400		9125	13.6
80		50	50	1	0.64	30	50	200	22			1000	170	5	3	3	0.6		373		38		3740		9125	14.96
81		50	50	1	0.64	30	50	200	24			1000	170	5	3	3	0.6		448		38		4080		9125	16.32
82		50	50	1	0.64	30	50	200	26			1000	170	5	3	3	0.6		528		38		4420		9125	17.68
83		50	50	1	0.64	30	50	200	28			1000	170	5	3	3	0.6		616		38		4760		9125	19.04
84		50	50	1	0.64	30	50	200	30			1000	170	5	3	3	0.6		714		38		5100		9125	20.4
85		100	100	1	0.64	30	50	200	20			1000	170	5	3	3	0.6		306		38		3400		9125	13.6
86		100	100	1	0.64	30	50	200	22			1000	170	5	3	3	0.6		373		38		3740		9125	14.96
87		100	100	1	0.64	30	50	200	24			1000	170	5	3	3	0.6		448		38		4080		9125	16.32
88		100	100	1	0.64	30	50	200	26			1000	170	5	3	3	0.6		528		38		4420		9125	17.68
89		100	100	1	0.64	30	50	200	28			1000	170	5	3	3	0.6		616		38		4760		9125	19.04
90		100	100	1	0.64	30	50	200	30			1000	170	5	3	3	0.6		714		38		5100		9125	20.4
91		0	100	0.5	0.64	30	50	200	20			1000	170	5	3	3	0.6		306		38		3400		9125	13.6
92		0	100	0.5	0.64	30	50	200	22			1000	170	5	3	3	0.6		373		38		3740		9125	14.96
93		0	100	0.5	0.64	30	50	200	24			1000	170	5	3	3	0.6		448		38		4080		9125	16.32
94		0	100	0.5	0.64	30	50	200	26			1000	170	5	3	3	0.6		528		38		4420		9125	17.68
95		0	100	0.5	0.64	30	50	200	28			1000	170	5	3	3	0.6		616		38		4760		9125	19.04
96		0	100	0.5	0.64	30	50	200	30			1000	170	5	3	3	0.6		714		38		5100		9125	20.4
97		0	0	1	0.52	25	80	200	20			1000	170	5	3	3	0		308		33		3400		9125	13.6
98		0	0	1	0.52	25	80	200	22			1000	170	5	3	3	0		376		33		3740		9125	14.96
99		0	0	1	0.52	25	80	200	24			1000	170	5	3	3	0		450		33		4080		9125	16.32
100		0	0	1	0.52	25	80	200	26			1000	170	5	3	3	0		532		33		4420		9125	17.68
101		0	0	1	0.52	25	80	200	28			1000	170	5	3	3	0		623		33		4760		9125	19.04
102		0	0	1	0.52	25	80	200	30			1000	170	5	3	3	0		722		33		5100		9125	20.4
103		50	50	1	0.52	25	80	200	20			1000	170	5	3	3	0		308		33		3400		9125	13.6
104		50	50	1	0.52	25	80	200	22			1000	170	5	3	3	0		376		33		3740		9125	14.96
105		50	50	1	0.52	25	80	200	24			1000	170	5	3	3	0		450		33		4080		9125	16.32
106		50	50	1	0.52	25	80	200	26			1000	170	5	3	3	0		532		33		4420		9125	17.68
107		50	50	1	0.52	25	80	200	28			1000	170	5	3	3	0		623		33		4760		9125	19.04
108		50	50	1	0.52	25	80	200	30			1000	170	5	3	3	0		722		33		5100		9125	20.4
109		100	100	1	0.52	25	80	200	20			1000	170	5	3	3	0		308		33		3400		9125	13.6
110		100	100	1	0.52	25	80	200	22			1000	170	5	3	3	0		376		33		3740		9125	14.96
111		100	100	1	0.52	25	80	200	24			1000	170	5	3	3	0		450		33		4080		9125	16.32
112		100	100	1	0.52	25	80	200	26			1000	170	5	3	3	0		532		33		4420		9125	17.68
113		100	100	1	0.52	25	80	200	28			1000	170	5	3	3	0		623		33		4760		9125	19.04
114		100	100	1	0.52	25	80	200	30			1000	170	5	3	3	0		722		33		5100		9125	20.4
115		0	100	0.5	0.52	25	80	200	20			1000	170	5	3	3	0		308		33		3400		9125	13.6
116		0	100	0.5	0.52	25	80	200	22			1000	170	5	3	3	0		376		33		3740		9125	14.96
117		0	100	0.5	0.52	25	80	200	24			1000	170	5	3	3	0		450		33		4080		9125	16.32
118		0	100	0.5	0.52	25	80	200	26			1000	170	5	3	3	0		532		33		4420		9125	17.68
119		0	100	0.5	0.52	25	80	200	28			1000	170	5	3	3	0		623		33		4760		9125	19.04
120		0	100	0.5	0.52	25	80	200	30			1000	170	5	3	3	0		722		33		5100		9125	20.4
121		0	0	1	0.64	25	80	200	20			1000	170	5	3	3	0.6		308		33		3400		9125	13.6
122		0	0	1	0.64	25	80	200	22			1000	170	5	3	3	0.6		376		33		3740		9125	14.96
123		0	0	1	0.64	25	80	200	24			1000	170	5	3	3	0.6		450		33		4080		9125	16.32
124		0	0	1	0.64	25	80	200	26			1000	170	5	3	3	0.6		532		33		4420		9125	17.68
125		0	0	1	0.64	25	80	200	28			1000	170	5	3	3	0.6		623		33		4760		9125	19.04
126		0	0	1	0.64	25	80	200	30			1000	170	5	3	3	0.6		722		33		5100		9125	20.4
127		50	50	1	0.64	25	80	200	20			1000	170	5	3	3	0.6		308		33		3400		9125	13.6
128		50	50	1	0.64	25	80	200	22			1000	170	5	3	3	0.6		376		33		3740		9125	14.96
129		50	50	1	0.64	25	80	200	24			1000	170	5	3	3	0.6		450		33		4080		9125	16.32
130		50	50	1	0.64	25	80	200	26			1000	170	5	3	3	0.6		532		33		4420		9125	17.68
131		50	50	1	0.64	25	80	200	28			1000	170	5	3	3	0.6		623		33		4760		9125	19.04
132		50	50	1	0.64	25	80	200	30			1000	170	5	3	3	0.6		722		33		5100		9125	20.4
133		100	100	1	0.64	25	80	200	20			1000	170	5	3	3	0.6		308		33		3400		9125	13.6
134		100	100	1	0.64	25	80	200	22			1000	170	5	3	3	0.6		376		33		3740		9125	14.96
135		100	100	1	0.64	25	80	200	24			1000	170	5	3	3	0.6		450		33		4080		9125	16.32
136		100	100	1	0.64	25	80	200	26			1000	170	5	3	3	0.6		532		33		4420		9125	17.68
137		100	100	1	0.64	25	80	200	28			1000	170	5	3	3	0.6		623		33		4760		9125	19.04
138		100	100	1	0.64	25	80	200	30			1000	170	5	3	3	0.6		722		33		5100		9125	20.4
139		0	100	0.5	0.64	25	80	200	20			1000	170	5	3	3	0.6		308		33		3400		9125	13.6
140		0	100	0.5	0.64	25	80	200	22			1000	170	5	3	3	0.6		376		33		3740		9125	14.96
141		0	100	0.5	0.64	25	80	200	24			1000	170	5	3	3	0.6		450		33		4080		9125	16.32
142		0	100	0.5	0.64	25	80	200	26			1000	170	5	3	3	0.6		532		33		4420		9125	17.68
143		0	100	0.5	0.64	25	80	200	28			1000	170	5	3	3	0.6		623		33		4760		9125	19.04
144		0	100	0.5	0.64	25	80	200	30			1000	170	5	3	3	0.6		722		33		5100		9125	20.4
145		0	0	1	0.52	25	50	200	20			1000	170	5	3	3	0		308		33		3400		9125	13.6
146		0	0	1	0.52	25	50	200	22			1000	170	5	3	3	0		376		33		3740		9125	14.96
147		0	0	1	0.52	25	50	200	24			1000	170	5	3	3	0		450		33		4080		9125	16.32
148		0	0	1	0.52	25	50	200	26			1000	170	5	3	3	0		532		33		4420		9125	17.68
149		0	0	1	0.52	25	50	200	28			1000	170	5	3	3	0		623		33		4760		9125	19.04
150		0	0	1	0.52	25	50	200	30			1000	170	5	3	3	0		722		33		5100		9125	20.4
151		50	50	1	0.52	25	50	200	20			1000	170	5	3	3	0		308		33		3400		9125	13.6
152		50	50	1	0.52	25	50	200	22			1000	170	5	3	3	0		376		33		3740		9125	14.96
153		50	50	1	0.52	25	50	200	24			1000	170	5	3	3	0		450		33		4080		9125	16.32
154		50	50	1	0.52	25	50	200	26			1000	170	5	3	3	0		532		33		4420		9125	17.68
155		50	50	1	0.52	25	50	200	28			1000	170	5	3	3	0		623		33		4760		9125	19.04
156		50	50	1	0.52	25	50	200	30			1000	170	5	3	3	0		722		33		5100		9125	20.4
157		100	100	1	0.52	25	50	200	20			1000	170	5	3	3	0		308		33		3400		9125	13.6
158		100	100	1	0.52	25	50	200	22			1000	170	5	3	3	0		376		33		3740		9125	14.96
159		100	100	1	0.52	25	50	200	24			1000	170	5	3	3	0		450		33		4080		9125	16.32
160		100	100	1	0.52	25	50	200	26			1000	170	5	3	3	0		532		33		4420		9125	17.68
161		100	100	1	0.52	25	50	200	28			1000	170	5	3	3	0		623		33		4760		9125	19.04
162		100	100	1	0.52	25	50	200	30			1000	170	5	3	3	0		722		33		5100		9125	20.4
163		0	100	0.5	0.52	25	50	200	20			1000	170	5	3	3	0		308		33		3400		9125	13.6
164		0	100	0.5	0.52	25	50	200	22			1000	170	5	3	3	0		376		33		3740		9125	14.96
165		0	100	0.5	0.52	25	50	200	24			1000	170	5	3	3	0		450		33		4080		9125	16.32
166		0	100	0.5	0.52	25	50	200	26			1000	170	5	3	3	0		532		33		4420		9125	17.68
167		0	100	0.5	0.52	25	50	200	28			1000	170	5	3	3	0		623		33		4760		9125	19.04
168		0	100	0.5	0.52	25	50	200	30			1000	170	5	3	3	0		722		33		5100		9125	20.4
169		0	0	1	0.64	25	50	200	20			1000	170	5	3	3	0.6		308		33		3400		9125	13.6
170		0	0	1	0.64	25	50	200	22			1000	170	5	3	3	0.6		376		33		3740		9125	14.96
171		0	0	1	0.64	25	50	200	24			1000	170	5	3	3	0.6		450		33		4080		9125	16.32
172		0	0	1	0.64	25	50	200	26			1000	170	5	3	3	0.6		532		33		4420		9125	17.68
173		0	0	1	0.64	25	50	200	28			1000	170	5	3	3	0.6		623		33		4760		9125	19.04
174		0	0	1	0.64	25	50	200	30			1000	170	5	3	3	0.6		722		33		5100		9125	20.4
175		50	50	1	0.64	25	50	200	20			1000	170	5	3	3	0.6		308		33		3400		9125	13.6
176		50	50	1	0.64	25	50	200	22			1000	170	5	3	3	0.6		376		33		3740		9125	14.96
177		50	50	1	0.64	25	50	200	24			1000	170	5	3	3	0.6		450		33		4080		9125	16.32
178		50	50	1	0.64	25	50	200	26			1000	170	5	3	3	0.6		532		33		4420		9125	17.68
179		50	50	1	0.64	25	50	200	28			1000	170	5	3	3	0.6		623		33		4760		9125	19.04
180		50	50	1	0.64	25	50	200	30			1000	170	5	3	3	0.6		722		33		5100		9125	20.4
181		100	100	1	0.64	25	50	200	20			1000	170	5	3	3	0.6		308		33		3400		9125	13.6
182		100	100	1	0.64	25	50	200	22			1000	170	5	3	3	0.6		376		33		3740		9125	14.96
183		100	100	1	0.64	25	50	200	24			1000	170	5	3	3	0.6		450		33		4080		9125	16.32
184		100	100	1	0.64	25	50	200	26			1000	170	5	3	3	0.6		532		33		4420		9125	17.68
185		100	100	1	0.64	25	50	200	28			1000	170	5	3	3	0.6		623		33		4760		9125	19.04
186		100	100	1	0.64	25	50	200	30			1000	170	5	3	3	0.6		722		33		5100		9125	20.4
187		0	100	0.5	0.64	25	50	200	20			1000	170	5	3	3	0.6		308		33		3400		9125	13.6
188		0	100	0.5	0.64	25	50	200	22			1000	170	5	3	3	0.6		376		33		3740		9125	14.96
189		0	100	0.5	0.64	25	50	200	24			1000	170	5	3	3	0.6		450		33		4080		9125	16.32
190		0	100	0.5	0.64	25	50	200	26			1000	170	5	3	3	0.6		532		33		4420		9125	17.68
191		0	100	0.5	0.64	25	50	200	28			1000	170	5	3	3	0.6		623		33		4760		9125	19.04
192		0	100	0.5	0.64	25	50	200	30			1000	170	5	3	3	0.6		722		33		5100		9125	20.4

## Sheet: Continuous_slabs
192
		Parameters
		1	2	3	4	5	6	7	8			9	10	11	12	13	14		15	16	17		18		19		20	21
		Top half (RCA%)	Bottom half (RCA%)	Top layer/h	qqp/qEd	fck (MPa)	RH (%)	h (mm)	L/d			b (mm)	d (mm)	gsw (N/mm')	Δg (N/mm')	q (N/mm')	ψ2		Ass (mm2)	Asl (mm2)	Asr (mm2)		fcm (MPa)		L (mm)		t (days)	alim (mm)
1		0	0	1	0.52	30	80	200	25			1000	170	5	3	3	0		486	256	269		38		4250		9125	17
2		0	0	1	0.52	30	80	200	26			1000	170	5	3	3	0		528	256	291		38		4420		9125	17.68
3		0	0	1	0.52	30	80	200	28			1000	170	5	3	3	0		616	256	339		38		4760		9125	19.04
4		0	0	1	0.52	30	80	200	30			1000	170	5	3	3	0		714	256	392		38		5100		9125	20.4
5		0	0	1	0.52	30	80	200	32			1000	170	5	3	3	0		817	256	448		38		5440		9125	21.76
6		0	0	1	0.52	30	80	200	35			1000	170	5	3	3	0		994	256	539		38		5950		9125	23.8
7		50	50	1	0.52	30	80	200	25			1000	170	5	3	3	0		486	256	269		38		4250		9125	17
8		50	50	1	0.52	30	80	200	26			1000	170	5	3	3	0		528	256	291		38		4420		9125	17.68
9		50	50	1	0.52	30	80	200	28			1000	170	5	3	3	0		616	256	339		38		4760		9125	19.04
10		50	50	1	0.52	30	80	200	30			1000	170	5	3	3	0		714	256	392		38		5100		9125	20.4
11		50	50	1	0.52	30	80	200	32			1000	170	5	3	3	0		817	256	448		38		5440		9125	21.76
12		50	50	1	0.52	30	80	200	35			1000	170	5	3	3	0		994	256	539		38		5950		9125	23.8
13		100	100	1	0.52	30	80	200	25			1000	170	5	3	3	0		486	256	269		38		4250		9125	17
14		100	100	1	0.52	30	80	200	26			1000	170	5	3	3	0		528	256	291		38		4420		9125	17.68
15		100	100	1	0.52	30	80	200	28			1000	170	5	3	3	0		616	256	339		38		4760		9125	19.04
16		100	100	1	0.52	30	80	200	30			1000	170	5	3	3	0		714	256	392		38		5100		9125	20.4
17		100	100	1	0.52	30	80	200	32			1000	170	5	3	3	0		817	256	448		38		5440		9125	21.76
18		100	100	1	0.52	30	80	200	35			1000	170	5	3	3	0		994	256	539		38		5950		9125	23.8
19		0	100	0.5	0.52	30	80	200	25			1000	170	5	3	3	0		486	256	269		38		4250		9125	17
20		0	100	0.5	0.52	30	80	200	26			1000	170	5	3	3	0		528	256	291		38		4420		9125	17.68
21		0	100	0.5	0.52	30	80	200	28			1000	170	5	3	3	0		616	256	339		38		4760		9125	19.04
22		0	100	0.5	0.52	30	80	200	30			1000	170	5	3	3	0		714	256	392		38		5100		9125	20.4
23		0	100	0.5	0.52	30	80	200	32			1000	170	5	3	3	0		817	256	448		38		5440		9125	21.76
24		0	100	0.5	0.52	30	80	200	35			1000	170	5	3	3	0		994	256	539		38		5950		9125	23.8
25		0	0	1	0.64	30	80	200	25			1000	170	5	3	3	0.6		486	256	269		38		4250		9125	17
26		0	0	1	0.64	30	80	200	26			1000	170	5	3	3	0.6		528	256	291		38		4420		9125	17.68
27		0	0	1	0.64	30	80	200	28			1000	170	5	3	3	0.6		616	256	339		38		4760		9125	19.04
28		0	0	1	0.64	30	80	200	30			1000	170	5	3	3	0.6		714	256	392		38		5100		9125	20.4
29		0	0	1	0.64	30	80	200	32			1000	170	5	3	3	0.6		817	256	448		38		5440		9125	21.76
30		0	0	1	0.64	30	80	200	35			1000	170	5	3	3	0.6		994	256	539		38		5950		9125	23.8
31		50	50	1	0.64	30	80	200	25			1000	170	5	3	3	0.6		486	256	269		38		4250		9125	17
32		50	50	1	0.64	30	80	200	26			1000	170	5	3	3	0.6		528	256	291		38		4420		9125	17.68
33		50	50	1	0.64	30	80	200	28			1000	170	5	3	3	0.6		616	256	339		38		4760		9125	19.04
34		50	50	1	0.64	30	80	200	30			1000	170	5	3	3	0.6		714	256	392		38		5100		9125	20.4
35		50	50	1	0.64	30	80	200	32			1000	170	5	3	3	0.6		817	256	448		38		5440		9125	21.76
36		50	50	1	0.64	30	80	200	35			1000	170	5	3	3	0.6		994	256	539		38		5950		9125	23.8
37		100	100	1	0.64	30	80	200	25			1000	170	5	3	3	0.6		486	256	269		38		4250		9125	17
38		100	100	1	0.64	30	80	200	26			1000	170	5	3	3	0.6		528	256	291		38		4420		9125	17.68
39		100	100	1	0.64	30	80	200	28			1000	170	5	3	3	0.6		616	256	339		38		4760		9125	19.04
40		100	100	1	0.64	30	80	200	30			1000	170	5	3	3	0.6		714	256	392		38		5100		9125	20.4
41		100	100	1	0.64	30	80	200	32			1000	170	5	3	3	0.6		817	256	448		38		5440		9125	21.76
42		100	100	1	0.64	30	80	200	35			1000	170	5	3	3	0.6		994	256	539		38		5950		9125	23.8
43		0	100	0.5	0.64	30	80	200	25			1000	170	5	3	3	0.6		486	256	269		38		4250		9125	17
44		0	100	0.5	0.64	30	80	200	26			1000	170	5	3	3	0.6		528	256	291		38		4420		9125	17.68
45		0	100	0.5	0.64	30	80	200	28			1000	170	5	3	3	0.6		616	256	339		38		4760		9125	19.04
46		0	100	0.5	0.64	30	80	200	30			1000	170	5	3	3	0.6		714	256	392		38		5100		9125	20.4
47		0	100	0.5	0.64	30	80	200	32			1000	170	5	3	3	0.6		817	256	448		38		5440		9125	21.76
48		0	100	0.5	0.64	30	80	200	35			1000	170	5	3	3	0.6		994	256	539		38		5950		9125	23.8
49		0	0	1	0.52	30	50	200	25			1000	170	5	3	3	0		486	256	269		38		4250		9125	17
50		0	0	1	0.52	30	50	200	26			1000	170	5	3	3	0		528	256	291		38		4420		9125	17.68
51		0	0	1	0.52	30	50	200	28			1000	170	5	3	3	0		616	256	339		38		4760		9125	19.04
52		0	0	1	0.52	30	50	200	30			1000	170	5	3	3	0		714	256	392		38		5100		9125	20.4
53		0	0	1	0.52	30	50	200	32			1000	170	5	3	3	0		817	256	448		38		5440		9125	21.76
54		0	0	1	0.52	30	50	200	35			1000	170	5	3	3	0		994	256	539		38		5950		9125	23.8
55		50	50	1	0.52	30	50	200	25			1000	170	5	3	3	0		486	256	269		38		4250		9125	17
56		50	50	1	0.52	30	50	200	26			1000	170	5	3	3	0		528	256	291		38		4420		9125	17.68
57		50	50	1	0.52	30	50	200	28			1000	170	5	3	3	0		616	256	339		38		4760		9125	19.04
58		50	50	1	0.52	30	50	200	30			1000	170	5	3	3	0		714	256	392		38		5100		9125	20.4
59		50	50	1	0.52	30	50	200	32			1000	170	5	3	3	0		817	256	448		38		5440		9125	21.76
60		50	50	1	0.52	30	50	200	35			1000	170	5	3	3	0		994	256	539		38		5950		9125	23.8
61		100	100	1	0.52	30	50	200	25			1000	170	5	3	3	0		486	256	269		38		4250		9125	17
62		100	100	1	0.52	30	50	200	26			1000	170	5	3	3	0		528	256	291		38		4420		9125	17.68
63		100	100	1	0.52	30	50	200	28			1000	170	5	3	3	0		616	256	339		38		4760		9125	19.04
64		100	100	1	0.52	30	50	200	30			1000	170	5	3	3	0		714	256	392		38		5100		9125	20.4
65		100	100	1	0.52	30	50	200	32			1000	170	5	3	3	0		817	256	448		38		5440		9125	21.76
66		100	100	1	0.52	30	50	200	35			1000	170	5	3	3	0		994	256	539		38		5950		9125	23.8
67		0	100	0.5	0.52	30	50	200	25			1000	170	5	3	3	0		486	256	269		38		4250		9125	17
68		0	100	0.5	0.52	30	50	200	26			1000	170	5	3	3	0		528	256	291		38		4420		9125	17.68
69		0	100	0.5	0.52	30	50	200	28			1000	170	5	3	3	0		616	256	339		38		4760		9125	19.04
70		0	100	0.5	0.52	30	50	200	30			1000	170	5	3	3	0		714	256	392		38		5100		9125	20.4
71		0	100	0.5	0.52	30	50	200	32			1000	170	5	3	3	0		817	256	448		38		5440		9125	21.76
72		0	100	0.5	0.52	30	50	200	35			1000	170	5	3	3	0		994	256	539		38		5950		9125	23.8
73		0	0	1	0.64	30	50	200	25			1000	170	5	3	3	0.6		486	256	269		38		4250		9125	17
74		0	0	1	0.64	30	50	200	26			1000	170	5	3	3	0.6		528	256	291		38		4420		9125	17.68
75		0	0	1	0.64	30	50	200	28			1000	170	5	3	3	0.6		616	256	339		38		4760		9125	19.04
76		0	0	1	0.64	30	50	200	30			1000	170	5	3	3	0.6		714	256	392		38		5100		9125	20.4
77		0	0	1	0.64	30	50	200	32			1000	170	5	3	3	0.6		817	256	448		38		5440		9125	21.76
78		0	0	1	0.64	30	50	200	35			1000	170	5	3	3	0.6		994	256	539		38		5950		9125	23.8
79		50	50	1	0.64	30	50	200	25			1000	170	5	3	3	0.6		486	256	269		38		4250		9125	17
80		50	50	1	0.64	30	50	200	26			1000	170	5	3	3	0.6		528	256	291		38		4420		9125	17.68
81		50	50	1	0.64	30	50	200	28			1000	170	5	3	3	0.6		616	256	339		38		4760		9125	19.04
82		50	50	1	0.64	30	50	200	30			1000	170	5	3	3	0.6		714	256	392		38		5100		9125	20.4
83		50	50	1	0.64	30	50	200	32			1000	170	5	3	3	0.6		817	256	448		38		5440		9125	21.76
84		50	50	1	0.64	30	50	200	35			1000	170	5	3	3	0.6		994	256	539		38		5950		9125	23.8
85		100	100	1	0.64	30	50	200	25			1000	170	5	3	3	0.6		486	256	269		38		4250		9125	17
86		100	100	1	0.64	30	50	200	26			1000	170	5	3	3	0.6		528	256	291		38		4420		9125	17.68
87		100	100	1	0.64	30	50	200	28			1000	170	5	3	3	0.6		616	256	339		38		4760		9125	19.04
88		100	100	1	0.64	30	50	200	30			1000	170	5	3	3	0.6		714	256	392		38		5100		9125	20.4
89		100	100	1	0.64	30	50	200	32			1000	170	5	3	3	0.6		817	256	448		38		5440		9125	21.76
90		100	100	1	0.64	30	50	200	35			1000	170	5	3	3	0.6		994	256	539		38		5950		9125	23.8
91		0	100	0.5	0.64	30	50	200	25			1000	170	5	3	3	0.6		486	256	269		38		4250		9125	17
92		0	100	0.5	0.64	30	50	200	26			1000	170	5	3	3	0.6		528	256	291		38		4420		9125	17.68
93		0	100	0.5	0.64	30	50	200	28			1000	170	5	3	3	0.6		616	256	339		38		4760		9125	19.04
94		0	100	0.5	0.64	30	50	200	30			1000	170	5	3	3	0.6		714	256	392		38		5100		9125	20.4
95		0	100	0.5	0.64	30	50	200	32			1000	170	5	3	3	0.6		817	256	448		38		5440		9125	21.76
96		0	100	0.5	0.64	30	50	200	35			1000	170	5	3	3	0.6		994	256	539		38		5950		9125	23.8
97		0	0	1	0.52	25	80	200	25			1000	170	5	3	3	0		490	230	270		33		4250		9125	17
98		0	0	1	0.52	25	80	200	26			1000	170	5	3	3	0		532	230	293		33		4420		9125	17.68
99		0	0	1	0.52	25	80	200	28			1000	170	5	3	3	0		623	230	341		33		4760		9125	19.04
100		0	0	1	0.52	25	80	200	30			1000	170	5	3	3	0		722	230	393		33		5100		9125	20.4
101		0	0	1	0.52	25	80	200	32			1000	170	5	3	3	0		931	230	450		33		5440		9125	21.76
102		0	0	1	0.52	25	80	200	35			1000	170	5	3	3	0		1011	230	543		33		5950		9125	23.8
103		50	50	1	0.52	25	80	200	25			1000	170	5	3	3	0		490	230	270		33		4250		9125	17
104		50	50	1	0.52	25	80	200	26			1000	170	5	3	3	0		532	230	293		33		4420		9125	17.68
105		50	50	1	0.52	25	80	200	28			1000	170	5	3	3	0		623	230	341		33		4760		9125	19.04
106		50	50	1	0.52	25	80	200	30			1000	170	5	3	3	0		722	230	393		33		5100		9125	20.4
107		50	50	1	0.52	25	80	200	32			1000	170	5	3	3	0		931	230	450		33		5440		9125	21.76
108		50	50	1	0.52	25	80	200	35			1000	170	5	3	3	0		1011	230	543		33		5950		9125	23.8
109		100	100	1	0.52	25	80	200	25			1000	170	5	3	3	0		490	230	270		33		4250		9125	17
110		100	100	1	0.52	25	80	200	26			1000	170	5	3	3	0		532	230	293		33		4420		9125	17.68
111		100	100	1	0.52	25	80	200	28			1000	170	5	3	3	0		623	230	341		33		4760		9125	19.04
112		100	100	1	0.52	25	80	200	30			1000	170	5	3	3	0		722	230	393		33		5100		9125	20.4
113		100	100	1	0.52	25	80	200	32			1000	170	5	3	3	0		931	230	450		33		5440		9125	21.76
114		100	100	1	0.52	25	80	200	35			1000	170	5	3	3	0		1011	230	543		33		5950		9125	23.8
115		0	100	0.5	0.52	25	80	200	25			1000	170	5	3	3	0		490	230	270		33		4250		9125	17
116		0	100	0.5	0.52	25	80	200	26			1000	170	5	3	3	0		532	230	293		33		4420		9125	17.68
117		0	100	0.5	0.52	25	80	200	28			1000	170	5	3	3	0		623	230	341		33		4760		9125	19.04
118		0	100	0.5	0.52	25	80	200	30			1000	170	5	3	3	0		722	230	393		33		5100		9125	20.4
119		0	100	0.5	0.52	25	80	200	32			1000	170	5	3	3	0		931	230	450		33		5440		9125	21.76
120		0	100	0.5	0.52	25	80	200	35			1000	170	5	3	3	0		1011	230	543		33		5950		9125	23.8
121		0	0	1	0.64	25	80	200	25			1000	170	5	3	3	0.6		490	230	270		33		4250		9125	17
122		0	0	1	0.64	25	80	200	26			1000	170	5	3	3	0.6		532	230	293		33		4420		9125	17.68
123		0	0	1	0.64	25	80	200	28			1000	170	5	3	3	0.6		623	230	341		33		4760		9125	19.04
124		0	0	1	0.64	25	80	200	30			1000	170	5	3	3	0.6		722	230	393		33		5100		9125	20.4
125		0	0	1	0.64	25	80	200	32			1000	170	5	3	3	0.6		931	230	450		33		5440		9125	21.76
126		0	0	1	0.64	25	80	200	35			1000	170	5	3	3	0.6		1011	230	543		33		5950		9125	23.8
127		50	50	1	0.64	25	80	200	25			1000	170	5	3	3	0.6		490	230	270		33		4250		9125	17
128		50	50	1	0.64	25	80	200	26			1000	170	5	3	3	0.6		532	230	293		33		4420		9125	17.68
129		50	50	1	0.64	25	80	200	28			1000	170	5	3	3	0.6		623	230	341		33		4760		9125	19.04
130		50	50	1	0.64	25	80	200	30			1000	170	5	3	3	0.6		722	230	393		33		5100		9125	20.4
131		50	50	1	0.64	25	80	200	32			1000	170	5	3	3	0.6		931	230	450		33		5440		9125	21.76
132		50	50	1	0.64	25	80	200	35			1000	170	5	3	3	0.6		1011	230	543		33		5950		9125	23.8
133		100	100	1	0.64	25	80	200	25			1000	170	5	3	3	0.6		490	230	270		33		4250		9125	17
134		100	100	1	0.64	25	80	200	26			1000	170	5	3	3	0.6		532	230	293		33		4420		9125	17.68
135		100	100	1	0.64	25	80	200	28			1000	170	5	3	3	0.6		623	230	341		33		4760		9125	19.04
136		100	100	1	0.64	25	80	200	30			1000	170	5	3	3	0.6		722	230	393		33		5100		9125	20.4
137		100	100	1	0.64	25	80	200	32			1000	170	5	3	3	0.6		931	230	450		33		5440		9125	21.76
138		100	100	1	0.64	25	80	200	35			1000	170	5	3	3	0.6		1011	230	543		33		5950		9125	23.8
139		0	100	0.5	0.64	25	80	200	25			1000	170	5	3	3	0.6		490	230	270		33		4250		9125	17
140		0	100	0.5	0.64	25	80	200	26			1000	170	5	3	3	0.6		532	230	293		33		4420		9125	17.68
141		0	100	0.5	0.64	25	80	200	28			1000	170	5	3	3	0.6		623	230	341		33		4760		9125	19.04
142		0	100	0.5	0.64	25	80	200	30			1000	170	5	3	3	0.6		722	230	393		33		5100		9125	20.4
143		0	100	0.5	0.64	25	80	200	32			1000	170	5	3	3	0.6		931	230	450		33		5440		9125	21.76
144		0	100	0.5	0.64	25	80	200	35			1000	170	5	3	3	0.6		1011	230	543		33		5950		9125	23.8
145		0	0	1	0.52	25	50	200	25			1000	170	5	3	3	0		490	230	270		33		4250		9125	17
146		0	0	1	0.52	25	50	200	26			1000	170	5	3	3	0		532	230	293		33		4420		9125	17.68
147		0	0	1	0.52	25	50	200	28			1000	170	5	3	3	0		623	230	341		33		4760		9125	19.04
148		0	0	1	0.52	25	50	200	30			1000	170	5	3	3	0		722	230	393		33		5100		9125	20.4
149		0	0	1	0.52	25	50	200	32			1000	170	5	3	3	0		931	230	450		33		5440		9125	21.76
150		0	0	1	0.52	25	50	200	35			1000	170	5	3	3	0		1011	230	543		33		5950		9125	23.8
151		50	50	1	0.52	25	50	200	25			1000	170	5	3	3	0		490	230	270		33		4250		9125	17
152		50	50	1	0.52	25	50	200	26			1000	170	5	3	3	0		532	230	293		33		4420		9125	17.68
153		50	50	1	0.52	25	50	200	28			1000	170	5	3	3	0		623	230	341		33		4760		9125	19.04
154		50	50	1	0.52	25	50	200	30			1000	170	5	3	3	0		722	230	393		33		5100		9125	20.4
155		50	50	1	0.52	25	50	200	32			1000	170	5	3	3	0		931	230	450		33		5440		9125	21.76
156		50	50	1	0.52	25	50	200	35			1000	170	5	3	3	0		1011	230	543		33		5950		9125	23.8
157		100	100	1	0.52	25	50	200	25			1000	170	5	3	3	0		490	230	270		33		4250		9125	17
158		100	100	1	0.52	25	50	200	26			1000	170	5	3	3	0		532	230	293		33		4420		9125	17.68
159		100	100	1	0.52	25	50	200	28			1000	170	5	3	3	0		623	230	341		33		4760		9125	19.04
160		100	100	1	0.52	25	50	200	30			1000	170	5	3	3	0		722	230	393		33		5100		9125	20.4
161		100	100	1	0.52	25	50	200	32			1000	170	5	3	3	0		931	230	450		33		5440		9125	21.76
162		100	100	1	0.52	25	50	200	35			1000	170	5	3	3	0		1011	230	543		33		5950		9125	23.8
163		0	100	0.5	0.52	25	50	200	25			1000	170	5	3	3	0		490	230	270		33		4250		9125	17
164		0	100	0.5	0.52	25	50	200	26			1000	170	5	3	3	0		532	230	293		33		4420		9125	17.68
165		0	100	0.5	0.52	25	50	200	28			1000	170	5	3	3	0		623	230	341		33		4760		9125	19.04
166		0	100	0.5	0.52	25	50	200	30			1000	170	5	3	3	0		722	230	393		33		5100		9125	20.4
167		0	100	0.5	0.52	25	50	200	32			1000	170	5	3	3	0		931	230	450		33		5440		9125	21.76
168		0	100	0.5	0.52	25	50	200	35			1000	170	5	3	3	0		1011	230	543		33		5950		9125	23.8
169		0	0	1	0.64	25	50	200	25			1000	170	5	3	3	0.6		490	230	270		33		4250		9125	17
170		0	0	1	0.64	25	50	200	26			1000	170	5	3	3	0.6		532	230	293		33		4420		9125	17.68
171		0	0	1	0.64	25	50	200	28			1000	170	5	3	3	0.6		623	230	341		33		4760		9125	19.04
172		0	0	1	0.64	25	50	200	30			1000	170	5	3	3	0.6		722	230	393		33		5100		9125	20.4
173		0	0	1	0.64	25	50	200	32			1000	170	5	3	3	0.6		931	230	450		33		5440		9125	21.76
174		0	0	1	0.64	25	50	200	35			1000	170	5	3	3	0.6		1011	230	543		33		5950		9125	23.8
175		50	50	1	0.64	25	50	200	25			1000	170	5	3	3	0.6		490	230	270		33		4250		9125	17
176		50	50	1	0.64	25	50	200	26			1000	170	5	3	3	0.6		532	230	293		33		4420		9125	17.68
177		50	50	1	0.64	25	50	200	28			1000	170	5	3	3	0.6		623	230	341		33		4760		9125	19.04
178		50	50	1	0.64	25	50	200	30			1000	170	5	3	3	0.6		722	230	393		33		5100		9125	20.4
179		50	50	1	0.64	25	50	200	32			1000	170	5	3	3	0.6		931	230	450		33		5440		9125	21.76
180		50	50	1	0.64	25	50	200	35			1000	170	5	3	3	0.6		1011	230	543		33		5950		9125	23.8
181		100	100	1	0.64	25	50	200	25			1000	170	5	3	3	0.6		490	230	270		33		4250		9125	17
182		100	100	1	0.64	25	50	200	26			1000	170	5	3	3	0.6		532	230	293		33		4420		9125	17.68
183		100	100	1	0.64	25	50	200	28			1000	170	5	3	3	0.6		623	230	341		33		4760		9125	19.04
184		100	100	1	0.64	25	50	200	30			1000	170	5	3	3	0.6		722	230	393		33		5100		9125	20.4
185		100	100	1	0.64	25	50	200	32			1000	170	5	3	3	0.6		931	230	450		33		5440		9125	21.76
186		100	100	1	0.64	25	50	200	35			1000	170	5	3	3	0.6		1011	230	543		33		5950		9125	23.8
187		0	100	0.5	0.64	25	50	200	25			1000	170	5	3	3	0.6		490	230	270		33		4250		9125	17
188		0	100	0.5	0.64	25	50	200	26			1000	170	5	3	3	0.6		532	230	293		33		4420		9125	17.68
189		0	100	0.5	0.64	25	50	200	28			1000	170	5	3	3	0.6		623	230	341		33		4760		9125	19.04
190		0	100	0.5	0.64	25	50	200	30			1000	170	5	3	3	0.6		722	230	393		33		5100		9125	20.4
191		0	100	0.5	0.64	25	50	200	32			1000	170	5	3	3	0.6		931	230	450		33		5440		9125	21.76
192		0	100	0.5	0.64	25	50	200	35			1000	170	5	3	3	0.6		1011	230	543		33		5950		9125	23.8
